# Supplementary material for: Parameters Influencing the Growth of ZnO Nanowires as Efficient Low Temperature Flexible Perovskite-Based Solar Cells
Source: PubMed Central journal article supplement (PMC5456534; doi:10.3390/ma9010060), 2016-01-19
Supplement: materials-09-00060-s001.pdf [file materials-09-00060-s001.pdf]

# Supplementary Materials: Parameters Influencing the Growth of ZnO Nanowires as Efficient Low Temperature Flexible Perovskite-Based Solar Cells

Alex Dymshits, Lior Iagher and Lioz Etgar

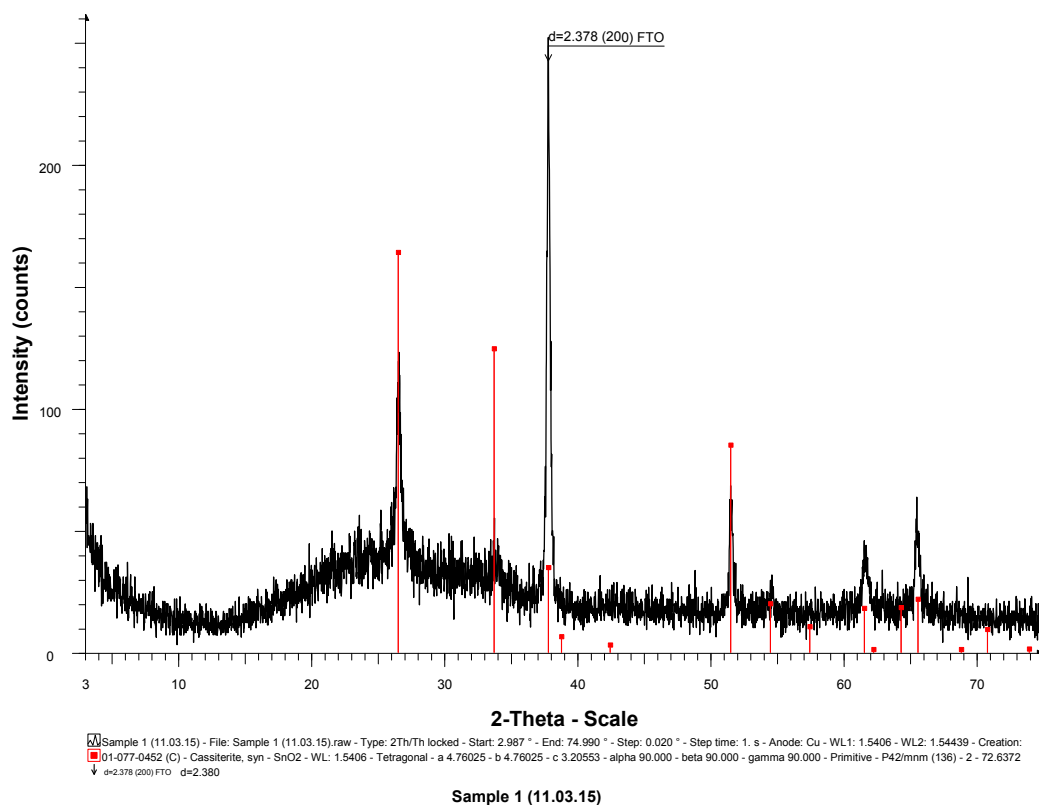

**Figure S1.** XRD spectra of the ZnAc seed layer. The only peaks observed in this spectrum are related to the FTO coating. Experimental parameter: 01-077-0452, Cassiterite, syn, SnO<sub>2</sub>; Crystallite Size (Scherrer): 287.9, Å; System: Tetragonal; Space group: P42/mmm (136); Cell parameter: (Initial → Final): a: 4.75520 → 4.76025; c: 3.19920 → 3.20553.

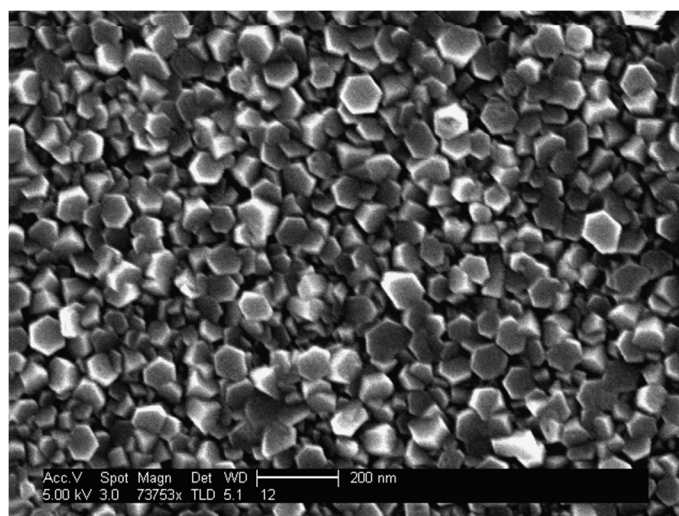

**Figure S2.** SEM top view of ZnO NWs grown at concentration of 110 mM.

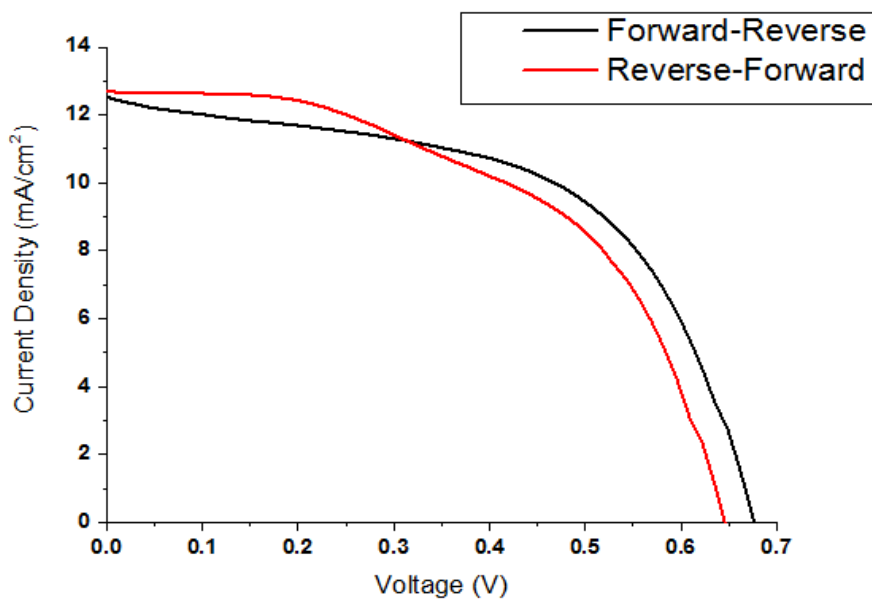

**Figure S3.** Example of forward to reverse and reverse to forward scan of the ZnO rigid solar cell. The Hysteresis index is  $-0.007$  with scan rate of  $0.032$  V/s.

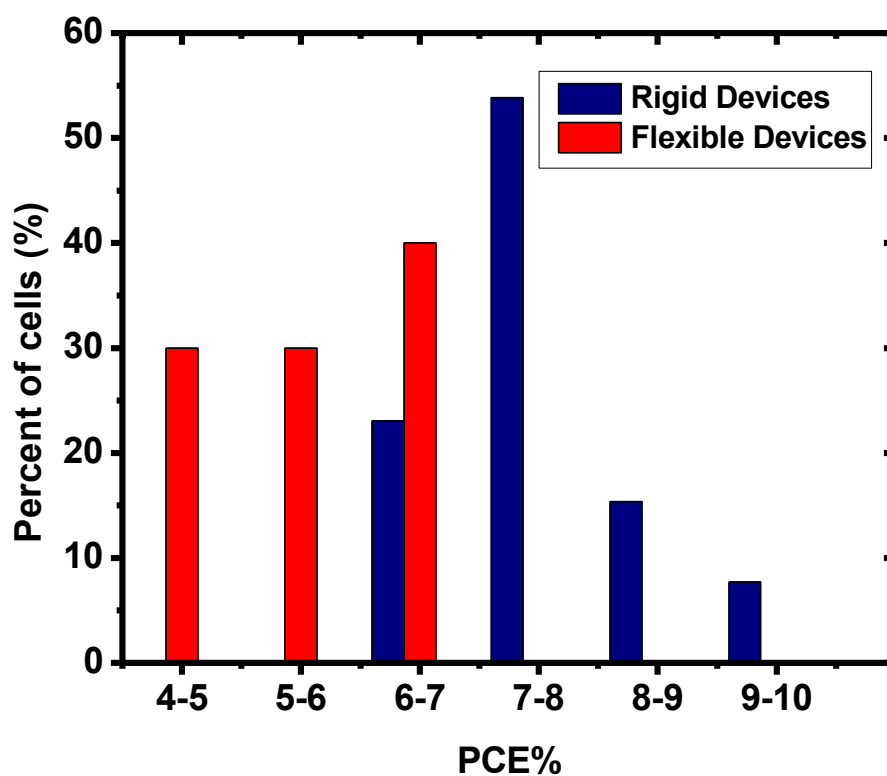

**Figure S4.** Histogram of the solar cells efficiency prepared in this study.
